# Supplementary material for: Expression of an S phase-stabilized version of the CDK inhibitor Dacapo can alter endoreplication
Source: Oxford University Press journal article supplement (doi:10.1242/dev.115006), 2015-01-01
Supplement: dev115006supp.pdf [file dev115006supp.pdf]

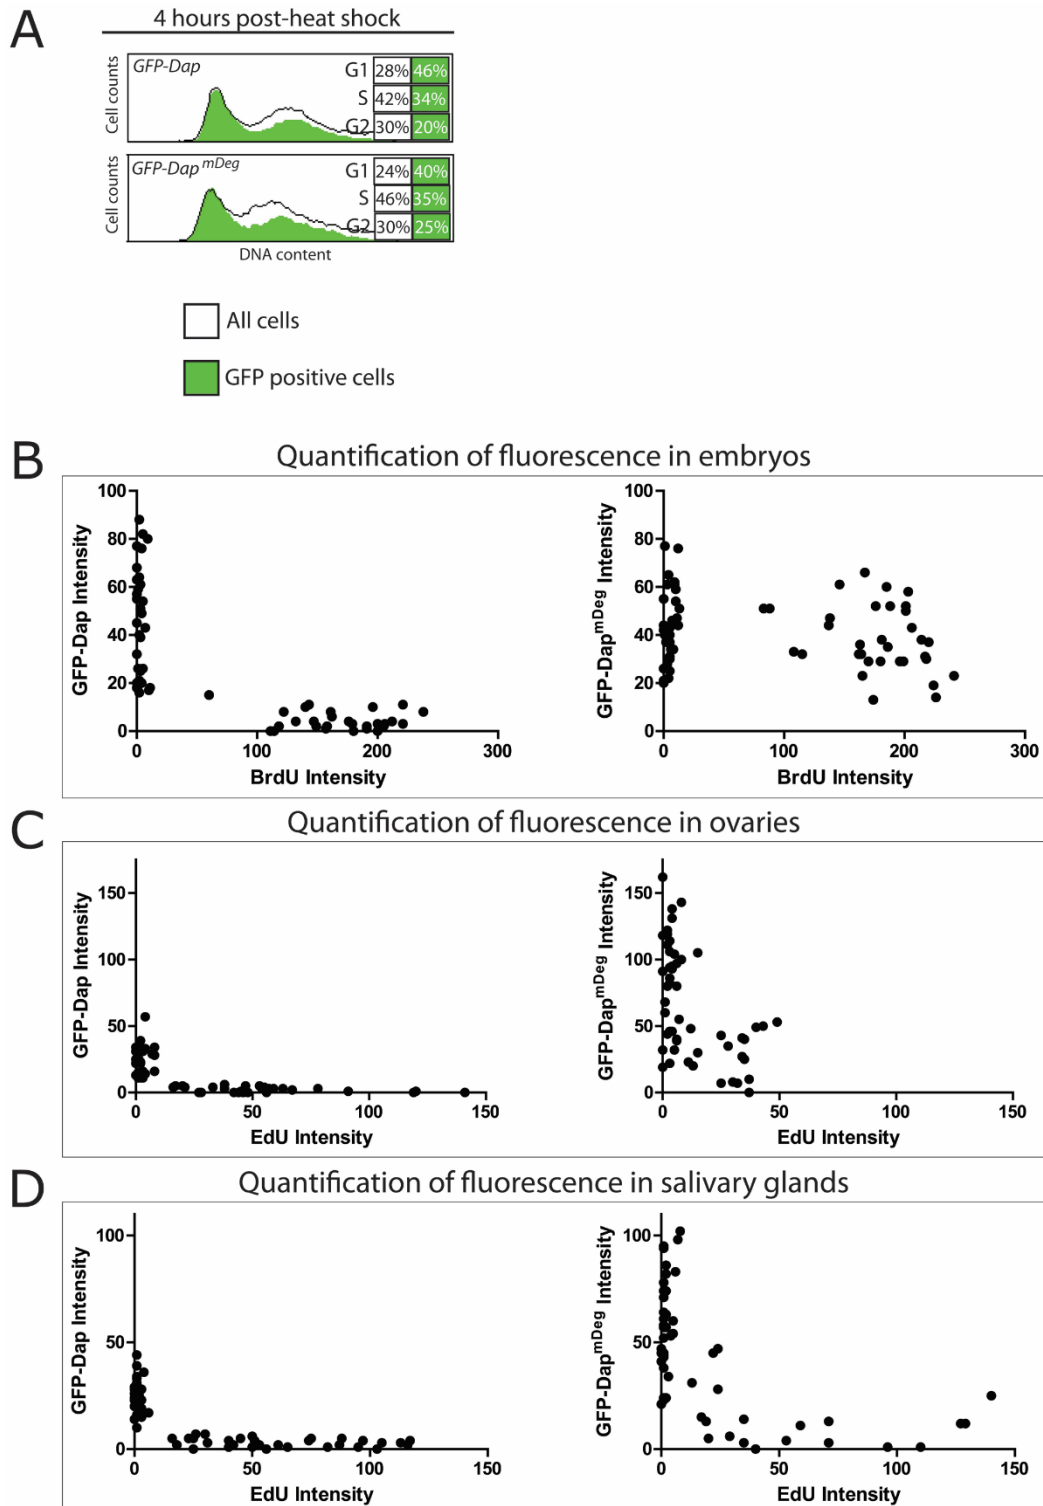

**Fig. S1. Mutation of the PIP degron does not inhibit Dap function in S2 cells.** (A) Flow cytometric analysis of GFP-Dap<sup>mDeg</sup> 4 hours following heat shock. At this time point there is an increase in the percentage of GFP-positive cells in G1 compared to the total cell

population, as expected since Dap inhibits Cyclin E/Cdk2 and therefore S-phase entry. (B) Alternate representation of the data shown in Figure 1H. Quantification of fluorescence in 5 hour old *tub>GFP-Dap* (left) and *tub>GFP-Dap<sup>mDeg</sup>* (right) embryos. Each point represents a single cell; three embryos per genotype were used for quantification. (C) Alternate representation of the data shown in Figure 4F. Quantification of fluorescence in Stage 10 *c323>GFP-Dap* (left) and *c323>GFP-Dap<sup>mDeg</sup>* (right) ovarian follicle cells. Each point represents a single cell; three egg chambers per genotype were used for quantification. (D) Alternate representation of the data shown in Figure 5H. Quantification of fluorescence in *ptc>GFP-Dap* (left) and *ptc>GFP-Dap<sup>mDeg</sup>* (right) salivary glands. Each point represents a single cell; three glands per genotype were used for quantification.

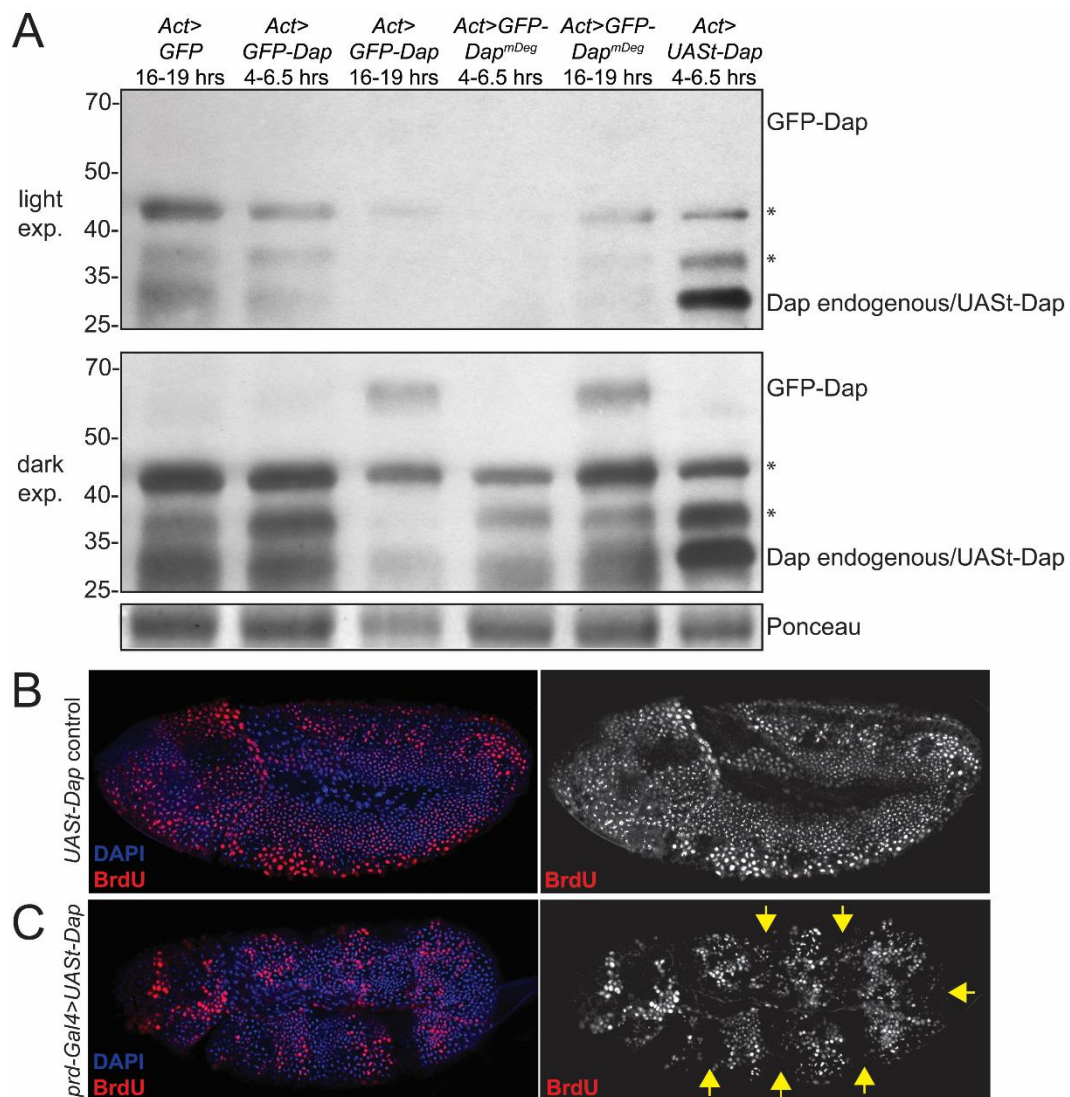

**Fig. S2. UASp-Dap transgenes activate lower levels of expression than UAS-Dap.** (A) Embryos were collected from *act-Gal4/CyO* mothers crossed to homozygous UAS-GFP or UAS-Dap lines. Therefore, ~50% of the embryos express the indicated transgene. Hours indicate age of embryos after egg deposition. UAS-Dap is from Lane et al (1996), and all other UAS-Dap transgenes are from this study. Both blots were probed with anti-Dap antibodies and stained with Ponceau to indicate loading, which was approximately 30 embryos per lane. Two exposures are shown. While Dap expressed from UAS is visible at 4-6.5 hrs AED at levels much higher than endogenous Dap, transgenic GFP-Dap cannot be

detected. We could detect GFP-Dap expression at a later embryonic time point (16-19 hrs); i.e. after a longer period of expression. Non-specific bands are indicated with \*, and protein size markers (in kDa) are indicated to the left. (B-C) Five hour old *UAS<sup>t</sup>-Dap* control (B) and *prd-Gal4>UAS<sup>t</sup>-Dap* (C) embryos labeled with BrdU (red) and DAPI (blue). Note the suppression of BrdU incorporation in *prd-GAL4*-expressing stripes (yellow arrows).

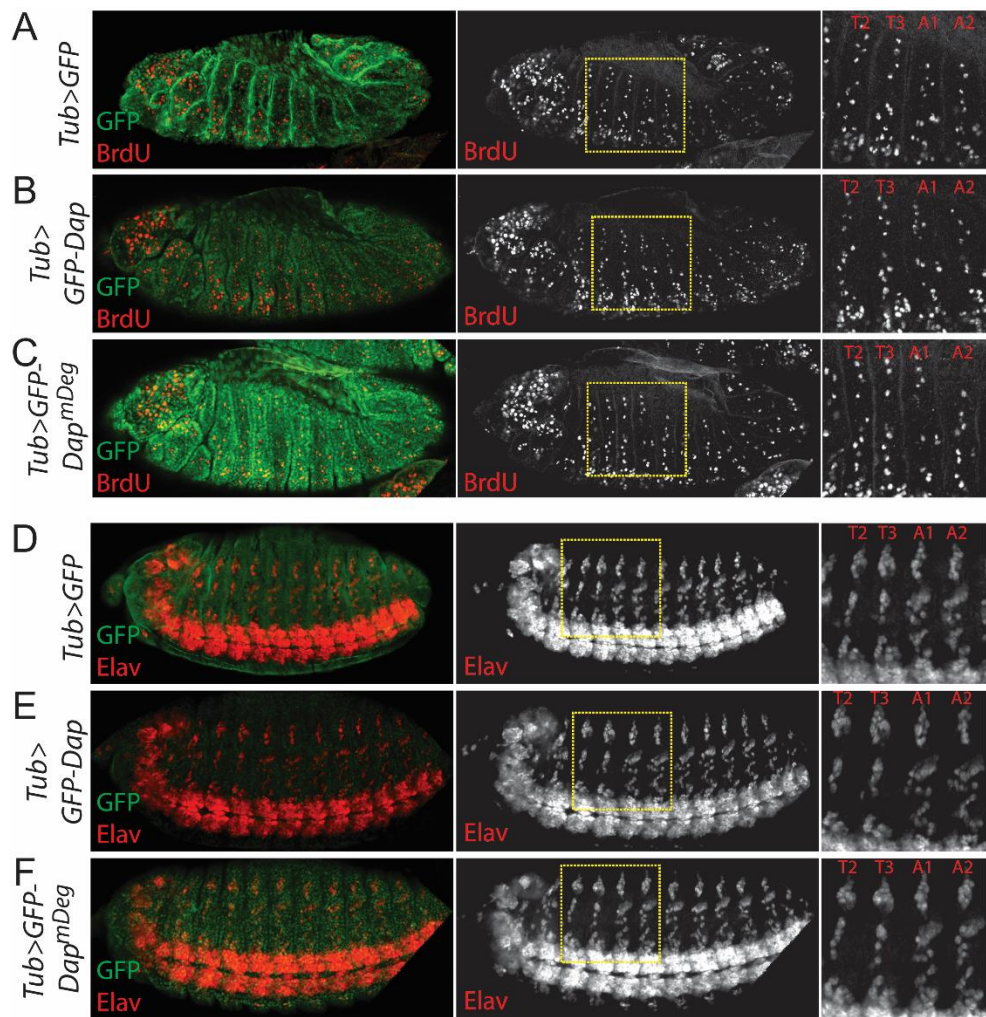

**Fig. S3. S phase-stabilized Dap does not overtly alter nervous system development.**

(A-C) Stage 12 embryos expressing GFP or the indicated GFP-Dap transgenes with *tub-GAL4* and labeled with BrdU (red) and anti-GFP antibodies (green). We were unable to detect significant differences in BrdU incorporation throughout the central or peripheral nervous systems in *tub>GFP*, *tub>GFP-Dap*, or *tub>GFP-Dap<sup>mDeg</sup>* embryos. (D-F) Stage 13 embryos expressing GFP or the indicated GFP-Dap transgenes with *tub-GAL4* and labeled with anti-GFP antibodies (green) and anti-ELAV antibodies (red) to examine neuronal differentiation. We were unable to detect significant differences in the pattern of ELAV staining among *tub>GFP*, *tub>GFP-Dap*, or *tub>GFP-Dap<sup>mDeg</sup>* embryos. Yellow boxes outline areas shown at higher magnification in panels on right; T2 and T3 = thoracic segments 2 and 3; A1 and A2 = abdominal segments 1 and 2.

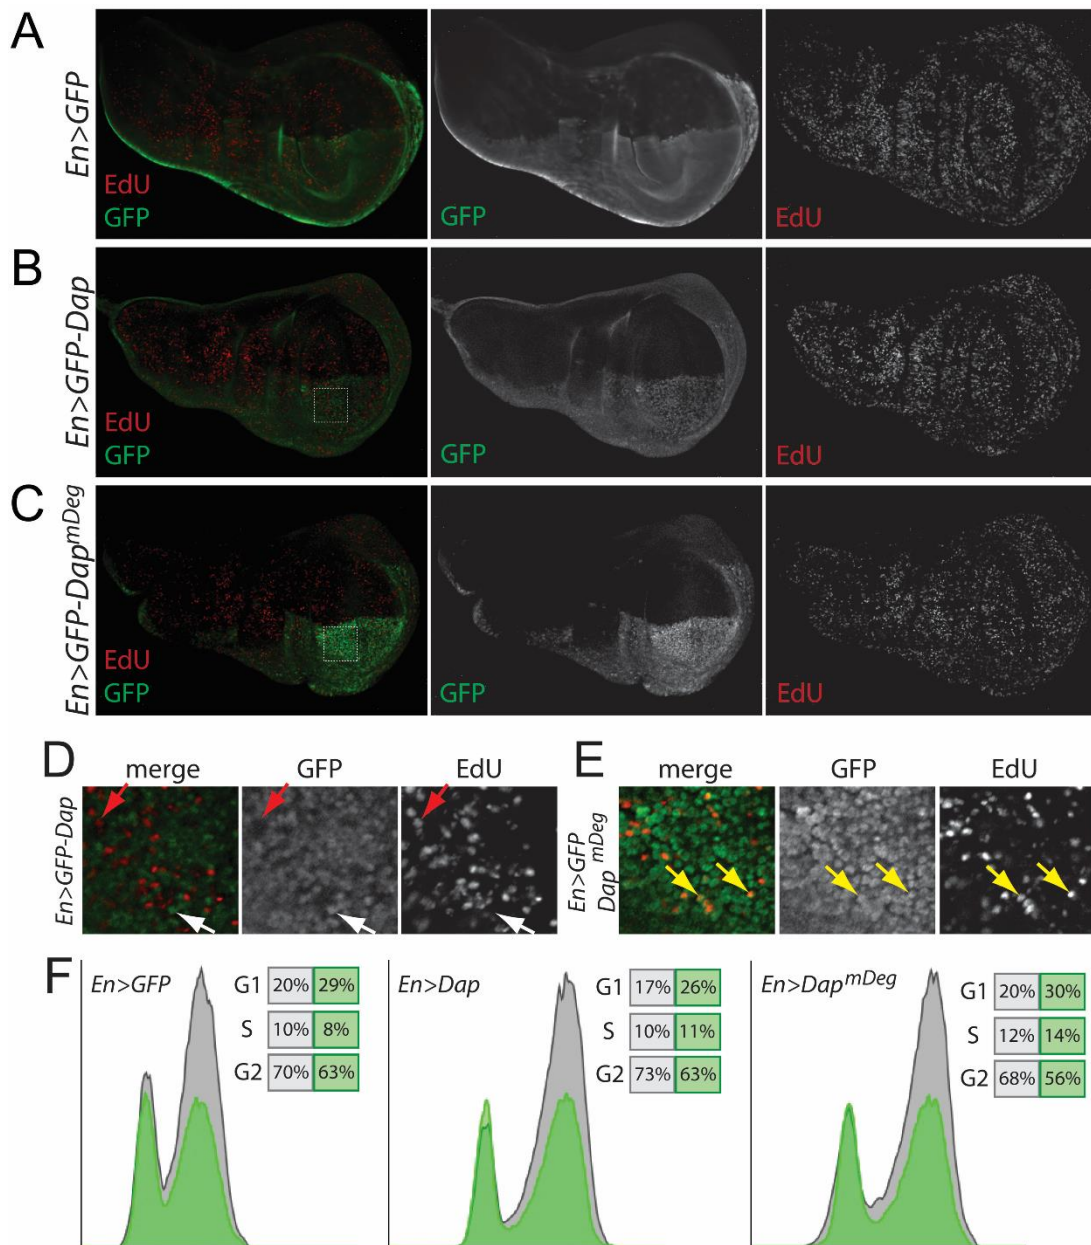

**Fig. S4. Normal proliferation in the wing imaginal disc in the presence of S phase-stabilized Dap.** (A-C) Third larval instar wing imaginal discs expressing GFP, GFP-Dap, or GFP-Dap<sup>mDeg</sup> in the posterior compartment with *en-GAL4* and labeled with EdU (red) and anti-GFP antibodies (green). We noted no obvious differences in S phase in the anterior versus posterior compartment in any of the three genotypes. (D, E) High magnification images of the region indicated with the white boxes in panels B and C. GFP-Dap accumulates in EdU-negative nuclei (white arrows) but not in EdU positive nuclei (red arrows). In

contrast, GFP-Dap<sup>mDeg</sup> accumulates in most nuclei, including those labeled with EdU (yellow arrows). (F) Wing discs expressing GFP alone or in combination with GFP-Dap or GFP-Dap<sup>mDeg</sup> under the control of *en-GAL4* were dissociated and DNA content were analyzed by flow cytometry. The grey histogram represents GFP- cells (anterior compartment, no transgene expressed) and the green histogram represents GFP+ cells (posterior compartment, transgenes expressed). The histograms shown are from one representative experiment, while the % cell cycle phase is an average from two (GFP) or three (GFP-Dap and GFP-Dap<sup>mDeg</sup>) experiments.

**Table S1. Parameter values for the updated endocycle model.**

| Parameter | Value                    | Source        |
|-----------|--------------------------|---------------|
| Le2f      | $2.01737 \times 10^{-2}$ | Zielke et al. |
| HE2F      | $4.95696 \times 10^1$    | Zielke et al. |
| Lrbf      | $1.28355 \times 10^{-1}$ | Zielke et al. |
| HRBF      | $4.76255 \times 10^1$    | Zielke et al. |
| Ccyce     | $6.38521 \times 10^{-2}$ | Zielke et al. |
| Lcyce     | $6.41289 \times 10^{-2}$ | Zielke et al. |
| Cbase     | $1.41396 \times 10^{-2}$ | Zielke et al. |
| Hcyce     | $1.56612 \times 10^1$    | Zielke et al. |
| HCYCE     | $1.55936 \times 10^1$    | Zielke et al. |
| Ldup      | $8.96353 \times 10^{-2}$ | Zielke et al. |
| HDUP      | $7.29125 \times 10^1$    | Zielke et al. |
| Lgem      | $2.74846 \times 10^{-1}$ | Zielke et al. |
| HGEM      | $1.22268 \times 10^2$    | Zielke et al. |
| HCUL      | $1.04044 \times 10^1$    | Zielke et al. |
| KRE       | $1.03072 \times 10^{-2}$ | Zielke et al. |
| KER       | $7.61116 \times 10^{-2}$ | Zielke et al. |
| KERp      | $7.47067 \times 10^{-1}$ | Zielke et al. |
| KND       | $1.20893 \times 10^{-1}$ | Zielke et al. |
| KGD       | 2.67595                  | Zielke et al. |
| KDG       | $2.6062 \times 10^{-1}$  | Zielke et al. |
| kCULe     | $6.83866 \times 10^{-2}$ | Zielke et al. |
| nuCULe    | 5                        | Zielke et al. |
| CULmaxE   | $2.87638 \times 10^{-1}$ | Zielke et al. |
| kCr       | $1.14596 \times 10^{-2}$ | Zielke et al. |
| nuCr      | 5                        | Zielke et al. |
| PmaxR     | $5.02815 \times 10^{-2}$ | Zielke et al. |
| DmaxR     | $7.43329 \times 10^{-2}$ | Zielke et al. |
| kEc       | $4.08772 \times 10^{-1}$ | Zielke et al. |
| nuEc      | 7                        | Zielke et al. |
| kRc       | $8.74772 \times 10^{-2}$ | Zielke et al. |
| nuRc      | 1                        | Zielke et al. |
| Dcyce     | $1.54073 \times 10^1$    | Zielke et al. |
| DRC       | $4.05764 \times 10^1$    | Zielke et al. |
| maxA      | $1.62473 \times 10^{-2}$ | Zielke et al. |



|           |                          |               |
|-----------|--------------------------|---------------|
| CmaxA     | $6.46459 \times 10^2$    | Zielke et al. |
| kCa       | $7.39395 \times 10^{-1}$ | Zielke et al. |
| nuCa      | 4                        | Zielke et al. |
| AmaxG     | $2.23532 \times 10^{-1}$ | Zielke et al. |
| kAg       | $2.78149 \times 10^{-1}$ | Zielke et al. |
| nuAg      | 7                        | Zielke et al. |
| CULmaxD   | $7.23261 \times 10^{-1}$ | Zielke et al. |
| kCULd     | $1.13506 \times 10^{-1}$ | Zielke et al. |
| nuCULd    | 1                        | Zielke et al. |
| kRCc      | $1.05168 \times 10^{-1}$ | Zielke et al. |
| nuRCc     | 7                        | Zielke et al. |
| RCmaxC    | $8.00826 \times 10^{-2}$ | Zielke et al. |
| kCp       | $6.54308 \times 10^{-2}$ | Zielke et al. |
| nuCp      | 3                        | Zielke et al. |
| CmaxP     | $6.25876 \times 10^{-2}$ | Zielke et al. |
| kCYCED    | $1.5 \times 10^{-3}$     | This Study    |
| Ldap      | $9.5 \times 10^1$        | This Study    |
| HDAP      | $1.15 \times 10^{-1}$    | This Study    |
| CYCEmaxD  | $1.05 \times 10^{-1}$    | This Study    |
| nuCD      | 1                        | This Study    |
| CULmaxDAP | $6.5 \times 10^{-1}$     | This Study    |
| kCULD     | $5. \times 10^{-2}$      | This Study    |
| DAPmaxC   | $9.5 \times 10^{-1}$     | This Study    |
| kDAPC     | $4.5 \times 10^{-1}$     | This Study    |
| nuDC      | 3                        | This Study    |
